# Supplementary material for: Proteomic analysis of hippocampus in mice following long-term exposure to low levels of copper
Source: Royal Society of Chemistry journal article supplement (doi:10.1039/c5tx00456j), 2016-01-01
Supplement: c5tx00456j1.pdf [file c5tx00456j1.pdf]

## **Supplementary Figure Legends**

### **Supplementary Fig. 1. Identification of SRR.**

A: MALDI-TOF-MS map of SRR; B: the amino acid sequences of SRR in which the matched peptide sequence is marked red; C: the protein score.

### **Supplementary Fig. 2. Identification of GFAP.**

A: MALDI-TOF-MS map of GFAP; B: the amino acid sequences of GFAP in which the matched peptide sequence is marked red; C: the protein score.
