# Supplementary material for: Proteomic analysis of hippocampus in mice following long-term exposure to low levels of copper
Source: Royal Society of Chemistry journal article supplement (doi:10.1039/c5tx00456j), 2016-01-01

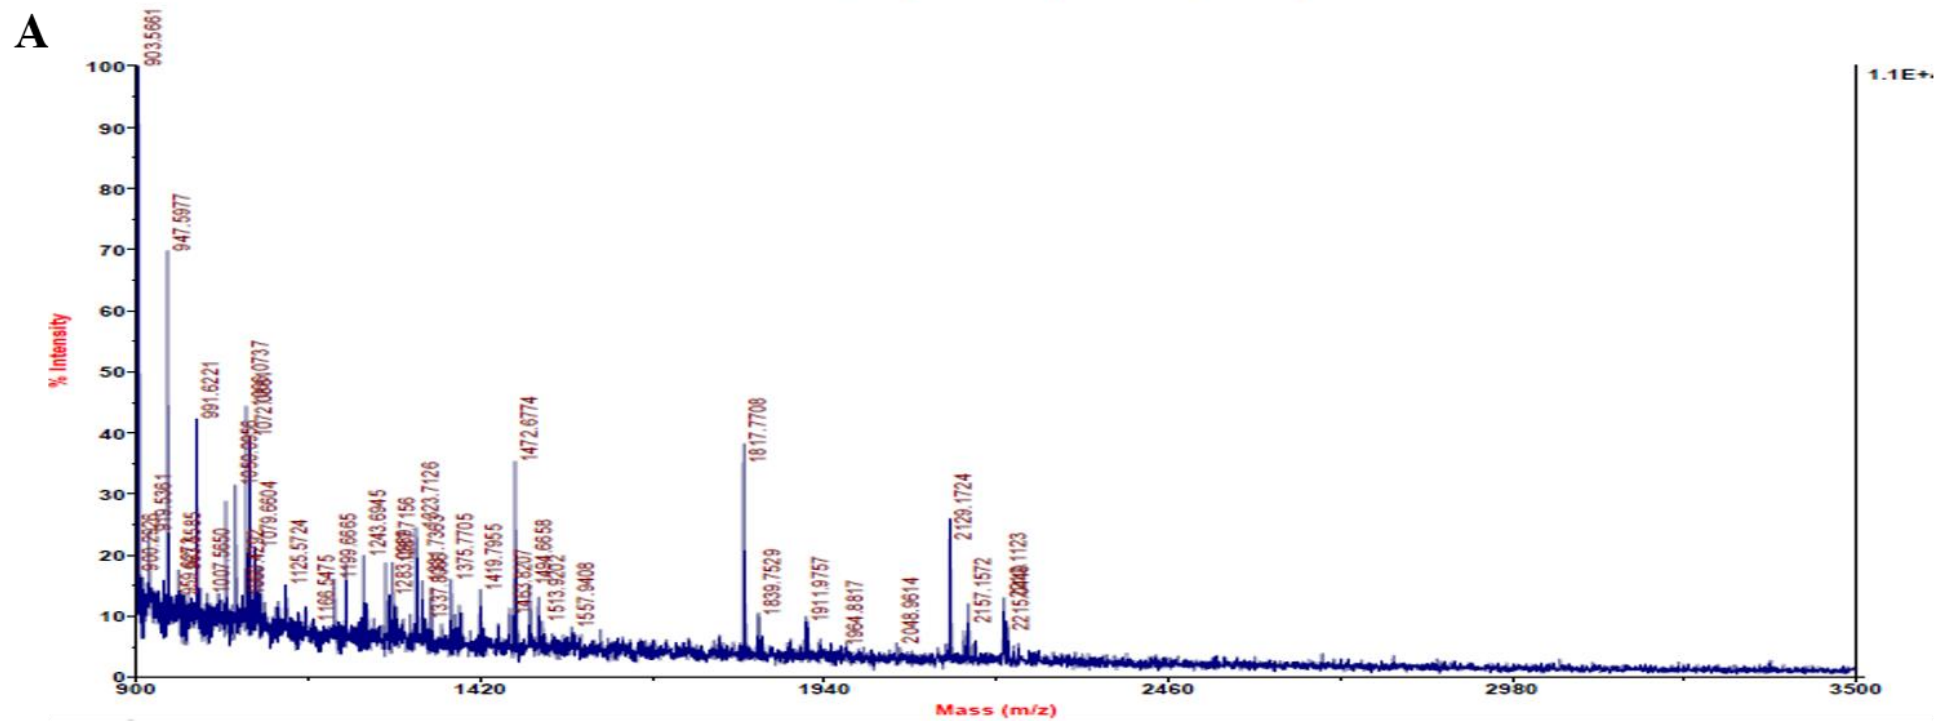

**B**

1 MCAQYCISFA DVEKAHINIQ DSIHLTPVLT SSILNQIAGR NLFFKCELFQ  
51 KTGSFKIRGA LNAIRGLIPD TPEEKPKAVV THSSGNHGQA LTYAAKLEGI  
101 PAYIVVPQTA PNCKKLAIQA YGASIVYCDP SDESREKVTQ RIMQETEGIL  
151 VHPNQEPAVI AGQGTIALEV LNQVPLVDAL VVPVGGGGMV AGIAITIKAL  
201 KPSVKVYAAE PSNADDCYQS KLKGELTPNL HPPETIADGV KSSIGLNTWP  
251 IIRDLVDDVF TVTEDEIKYA TQLVWGRMKL LIEPTAGVAL AAVLSQHFQT  
301 VSPEVKNCVI VLSGGNVDLT SLNWVGQAER PAPYQTVSV

C

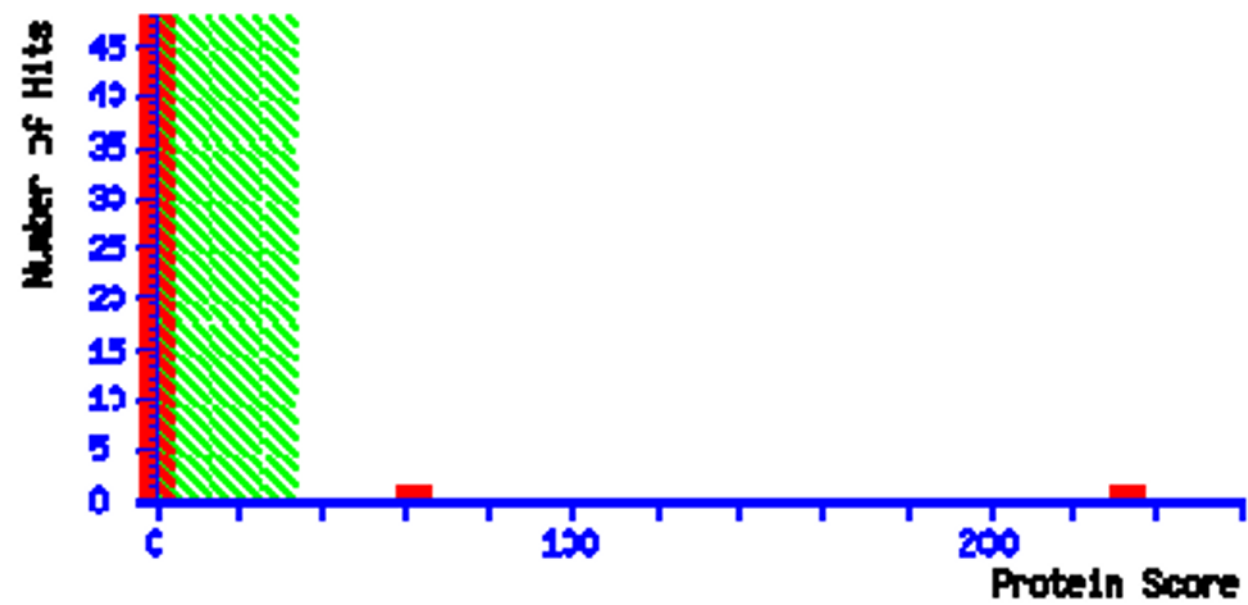

A

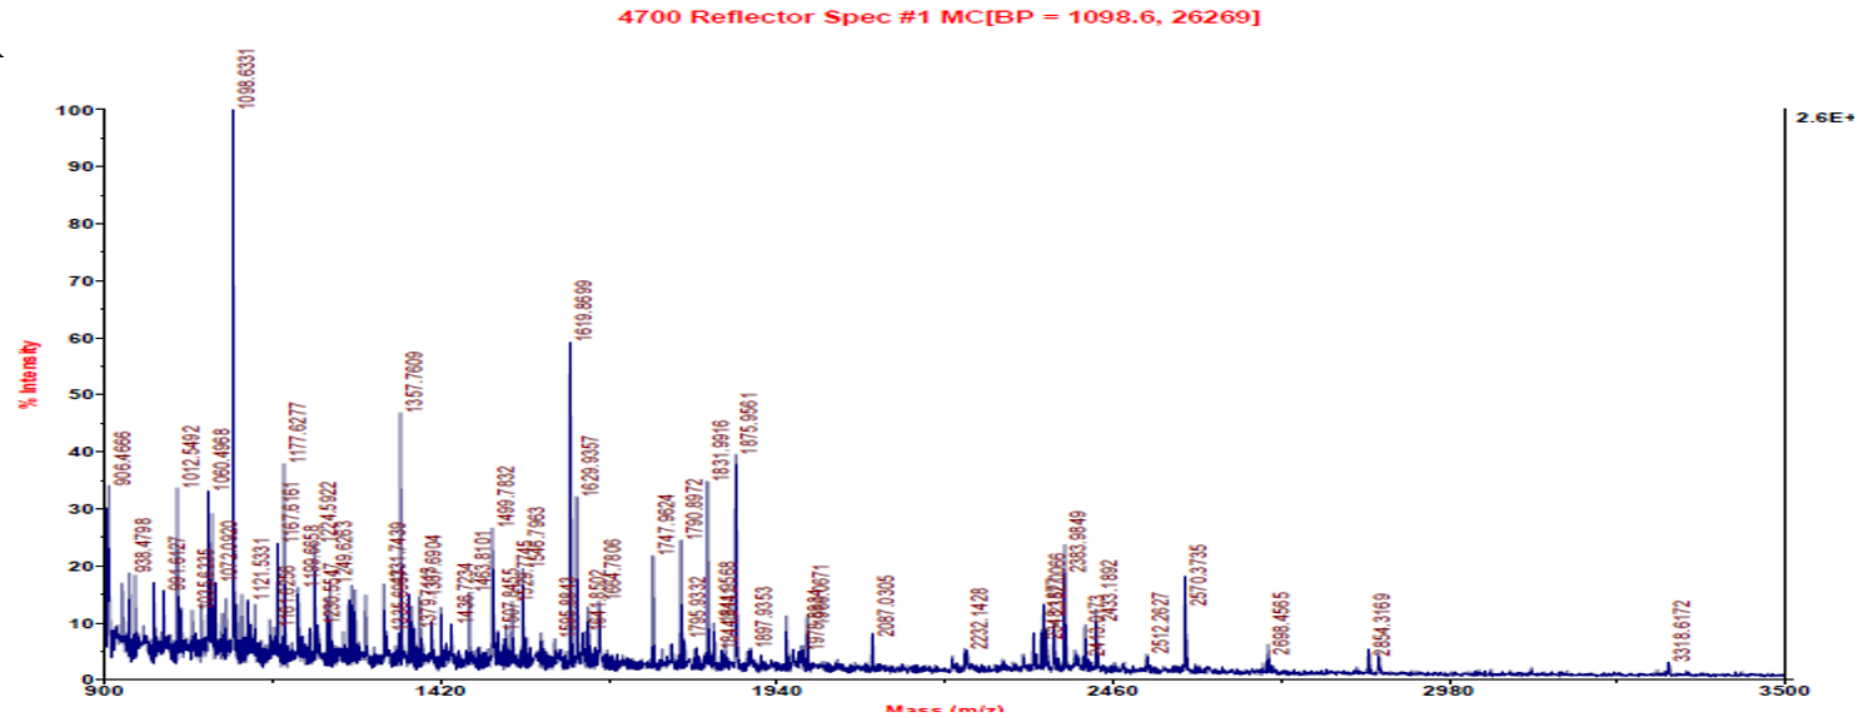

B

|     |            |             |            |            |             |
|-----|------------|-------------|------------|------------|-------------|
| 1   | MERRRITSAR | RSYASETVVR  | GLGPSRQLGT | MPRFSLSRMT | PPLPARVDFS  |
| 51  | LAGALNAGFK | ETRASERAEM  | MELNDRFASY | IEKVRFLQQ  | NKALAAELNQ  |
| 101 | LRAKEPTKLA | DVYQAEELREL | RLRLDQLTAN | SARLEVERDN | FAQDLGTLRQ  |
| 151 | KLQDETNLRL | EAENNLAAAYR | QEADEATLAR | VDLERKVESL | EEEIQFLRKI  |
| 201 | YEEEVRELRE | QLAQQQVHVE  | MDVAKPDLTA | ALREIRTQYE | AVATSNMQET  |
| 251 | EEWYRSKFAD | LTDAASRNAE  | LLRQAKHEAN | DYRRQLQALT | CDLES LRGTN |
| 301 | ESLERQMREQ | EERHARESAS  | YQEALARLEE | EGQSLKEEMA | RHLQEYQDLL  |
| 351 | NVKLALDIEI | ATYRKLLEGE  | ENRITIPVQT | FSNLQIRETS | LDTKSVSEGH  |
| 401 | LKRNIVVKTV | EMRDGEVIKD  | SKQEHKDVVM |            |             |

C

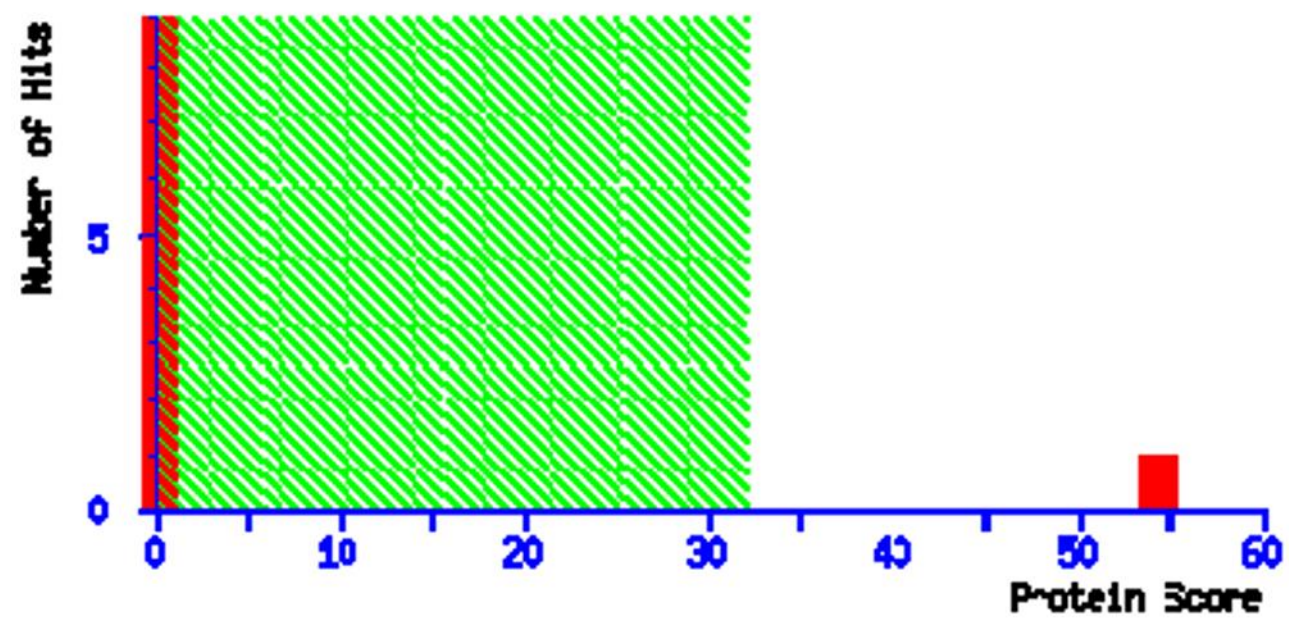

Supplement: c5tx00456j3.pdf [file c5tx00456j3.pdf]
